# Supplementary material for: Association between sulfur microbial diet and the risk of colorectal cancer precursors in older adults
Source: Frontiers journal article supplement (doi:10.3389/fnut.2023.1167372), 2023-08-14
Supplement: Data_Sheet_1.PDF [file Data_Sheet_1.PDF]

## *Supplementary Material*

### **Association Between Sulfur Microbial Diet and the Risk of Colorectal Cancer Precursors in Older Adults**

**Yi Xiao <sup>1</sup>, Ling Xiang <sup>2</sup>, Haitao Gu <sup>1</sup>, Zhiquan Xu <sup>1</sup>, Haoyun Luo <sup>1</sup>, Xiaorui Ren <sup>1</sup>, Bo Li <sup>1</sup>, Qi Wei <sup>1</sup>, Zhiyong Zhu <sup>1</sup>, Yahui Jiang <sup>1</sup>, He Zhou <sup>3,4</sup>, Yunhao Tang <sup>1</sup>, Hongmei He <sup>1</sup>, Zhihang Zhou <sup>5</sup>, Linglong Peng <sup>1</sup>, Yaxu Wang <sup>1\*</sup>**

<sup>1</sup> Department of Gastrointestinal Surgery, The Second Affiliated Hospital of Chongqing Medical University, Chongqing, China.

<sup>2</sup> Department of Clinical Nutrition, The Second Affiliated Hospital of Chongqing Medical University, Chongqing, China.

<sup>3</sup> Laboratory of Cancer Biology Department of Oncology, University of Oxford, Old Road Campus Research Building, Oxford, UK.

<sup>4</sup> The Second Department of Gastrointestinal Surgery, Affiliated Hospital of North Sichuan Medical College, Nanchong, Sichuan, China.

<sup>5</sup> Department of Gastroenterology, The Second Affiliated Hospital of Chongqing Medical University, Chongqing, China.

**\* Correspondence:**

**Corresponding Author: Yaxu Wang, 288 Tianwen Avenue, Nan'an District, Chongqing, China. [300897@hospital.cqmu.edu.cn](mailto:300897@hospital.cqmu.edu.cn) (Yaxu Wang).**

## Supplementary Tables

**Supplementary Table 1.** Criteria for determining dietary Sulfur Microbial Diet score

| Points | Energy-adjusted dietary intakes of individual components |                |                            |              |                      |                    |                            |                                 |
|--------|----------------------------------------------------------|----------------|----------------------------|--------------|----------------------|--------------------|----------------------------|---------------------------------|
|        | Processed meat (g/day)                                   | Liquor (g/day) | Low-calorie drinks (g/day) | Beer (g/day) | Fruit drinks (g/day) | Legumes (cups/day) | Whole grain (servings/day) | Other vegetables (servings/day) |
| 4      | ≥15.91                                                   | ≥3.90          | ≥49.22                     | ≤0           | ≤0                   | ≤0.04              | ≤0.75                      | ≤1.20                           |
| 3      | 7.22–15.90                                               | 0.52–3.89      | 5.67–49.21                 | 0.01–4.01    | 0.01–1.81            | 0.05–0.07          | 0.76–1.28                  | 1.21–1.76                       |
| 2      | 3.13–7.21                                                | 0.01–0.51      | 1.65–5.66                  | 4.02–31.80   | 1.82–3.68            | 0.08–0.12          | 1.29–1.97                  | 1.77–2.50                       |
| 1      | ≤3.12                                                    | 0              | ≤1.64                      | ≥31.81       | ≥3.69                | ≥0.13              | ≥1.98                      | ≥2.51                           |

**Supplementary Table 2.** Distribution of covariates with missing data before and after imputation \*

| Variable                                          | Before imputation | After imputation | Number (%) with missing data |
|---------------------------------------------------|-------------------|------------------|------------------------------|
| Family history of colorectal cancer               |                   |                  | 113 (0.64%)                  |
| No                                                | 15655 (88.81%)    | 15542 (88.74%)   |                              |
| Yes                                               | 1521 (8.63%)      | 1521 (8.68%)     |                              |
| Possibly                                          | 451 (2.56%)       | 451 (2.58%)      |                              |
| Body mass index (kg/m <sup>2</sup> )              | 27.09±4.55        | 27.22±4.79       | 164 (0.93%)                  |
| Smoking status                                    |                   |                  | 4 (0.02%)                    |
| Never                                             | 9379 (53.21%)     | 9375 (53.20%)    |                              |
| Current                                           | 970 (5.50%)       | 970 (5.50%)      |                              |
| Former                                            | 7278 (41.29%)     | 7278 (41.30%)    |                              |
| Smoking pack-years                                | 13.93±23.50       | 14.06±23.57      | 156 (0.89%)                  |
| Aspirin use                                       |                   |                  | 54 (0.31%)                   |
| No                                                | 9418 (53.43%)     | 9364 (53.29%)    |                              |
| Yes                                               | 8209 (46.57%)     | 8209 (46.71%)    |                              |
| History of hypertension                           |                   |                  | 8 (0.05%)                    |
| No                                                | 12236 (69.42%)    | 12228 (69.40%)   |                              |
| Yes                                               | 5391 (30.58%)     | 5391 (30.60%)    |                              |
| History of diabetes                               |                   |                  | 3 (0.02%)                    |
| No                                                | 16563 (93.96%)    | 16560 (93.96%)   |                              |
| Yes                                               | 1064 (6.04%)      | 1064 (6.04%)     |                              |
| History of Colonoscopy or Test for Blood in Stool |                   |                  | 16 (0.09%)                   |
| No                                                | 9963 (56.52%)     | 16786 (95.32%)   |                              |
| Yes                                               | 7664 (43.48%)     | 825 (4.68%)      |                              |
| Physical activity level (min/week)                | 129.78±111.27     | 131.18±124.30    | 3927 (22.28%)                |

**Supplementary Table 3.** Hazard ratios of the association of SMDs with the risk of colorectal adenoma in 12916 participants with complete data

| Quartiles of SMDs  | Number of cases | Person-years | Incidence rate per 100 person-years (95% confidence interval) | Hazard ratio (95% confidence interval) |                      |                      |
|--------------------|-----------------|--------------|---------------------------------------------------------------|----------------------------------------|----------------------|----------------------|
|                    |                 |              |                                                               | Unadjusted                             | Model 1 <sup>a</sup> | Model 2 <sup>b</sup> |
| Quartile 1 (8-18)  | 194             | 45200.61     | 0.429 (0.373, 0.494)                                          | 1.000 (reference)                      | 1.000 (reference)    | 1.000 (reference)    |
| Quartile 2 (19-20) | 149             | 33453.29     | 0.445 (0.380, 0.523)                                          | 1.02 (0.83, 1.27)                      | 1.02 (0.83, 1.27)    | 1.01 (0.81, 1.25)    |
| Quartile 3 (21-22) | 181             | 33501.22     | 0.540 (0.467, 0.625)                                          | 1.23 (1.01, 1.51)                      | 1.26 (1.03, 1.54)    | 1.25 (1.01, 1.53)    |
| Quartile 4 (23-32) | 190             | 33397.78     | 0.569 (0.494, 0.655)                                          | 1.28 (1.05, 1.57)                      | 1.28 (1.04, 1.56)    | 1.24 (1.00, 1.54)    |
| <i>P</i> -trend    |                 |              |                                                               | 0.008                                  | 0.010                | 0.029                |

SMD, sulfur microbial diet.

<sup>a</sup> Model 1: model 1 was controlled with age (continuous), sex (male, female), race (white, no-white) and education levels (college below, college graduate, postgraduate).

<sup>b</sup> Model2: model 2 was additionally controlled with smoking status (never, current, former), pack-years of smoking (continuous), BMI (continuous), aspirin use (no, yes), history of hypertension (no, yes), history of diabetes (no, yes), family history of colorectal cancer (no, yes), total energy intake (continuous), history of diverticulitis or diverticulosis (no, yes), history of colonoscopy in past 3 years (no, yes), and physical activity level (continuous).
